# Supplementary material for: Visible light-induced oxidative α-hydroxylation of β-dicarbonyl compounds catalyzed by ethylenediamine–copper(ii)
Source: Royal Society of Chemistry journal article supplement (doi:10.1039/d2ra07411g), 2023-01-01

# Visible Light-induced Oxidative $\alpha$ -Hydroxylation of $\beta$ -Dicarbonyl Compounds Catalyzed by Ethylenediamine-Copper(II)

Yujie He,<sup>a</sup> Hao Yin,<sup>b</sup> Yifeng Wang,<sup>\*b</sup> Mingming Chu,<sup>\*a</sup> and Yiming Li<sup>\*a</sup>

---

<sup>a</sup>College of Biological, Chemical Sciences and Engineering, Jiaying University, Jiaying, 314001, China. E-mail: [chumingming@zjxu.edu.cn](mailto:chumingming@zjxu.edu.cn), [liyiming@zjxu.edu.cn](mailto:liyiming@zjxu.edu.cn).

<sup>b</sup>Department of Green Chemistry and Technology, Zhejiang University of Technology, Hangzhou 310014, P. R. China. E-mail: [wangyifeng@zjut.edu.cn](mailto:wangyifeng@zjut.edu.cn)

## List of Contents

|                                                   |    |
|---------------------------------------------------|----|
| 1. General information.....                       | S2 |
| 2. Mass spectrum of the control experiment .....  | S2 |
| 3. General procedure for the synthesis of 2 ..... | S2 |
| 4. Characterization data of products 2.....       | S2 |
| 5. NMR spectra of products 2.....                 | S8 |

## 1. General information

Unless otherwise stated, all reagents were purchased from commercial suppliers and used without purifications. The  $\beta$ -keto esters [1] were synthesized according to the known method. All reactions were carried out in glassware. Reactions were monitored by TLC on silica gel precoated on glass plates, and spots were visualized with UV light at 254nm. Flash column chromatography was performed on silica-gel.  $^1\text{H}$  and  $^{13}\text{C}$  NMR were recorded in  $\text{CDCl}_3$  on Bruker ASCEND (600 MHz). TMS served as internal standard ( $\delta = 0$  ppm) for  $^1\text{H}$  NMR and  $\text{CDCl}_3$  was used as internal standard ( $\delta = 77.0$  ppm) for  $^{13}\text{C}$  NMR; High-resolution electrospray ionization mass spectra (HR-ESI-MS) were recorded on an Agilent 6545 Q-TOF LCMS spectrometer equipped with an ESI source and controlled by using Mass Hunter software.

[1] Pericas, À.; Shafir, A.; Vallribera, A. *Tetrahedron*. **2008**, *64*, 9258.

## 2. Mass spectrum of the control experiment

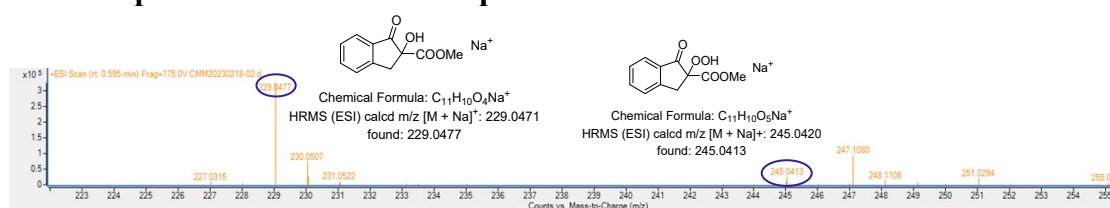

## 3. General procedure for the synthesis of 2

Copper acetate (1.81 mg, 0.01 mmol) and ethylenediamine  $\text{L}_1$  (0.6 mg, 0.01 mmol) were added to the test tube containing tetrahydrofuran (2 mL). The mixture was stirred at room temperature for 0.5 h. The  $\beta$ -keto esters **1** (0.1 mmol) and TPP (0.006 mg, 0.01 mol%) were added to above prepared catalyst solution, The resulting mixture was vented with air and stirred under the irradiation of 10 W-525 nm green light for 7 h, the reaction was monitored by thin-layer chromatography (TLC). After completion, the reaction mixture was concentrated in vacuo and purified by flash column chromatography on silica gel (petroleum ether/EtOAc = 5:1) to afford the desired product.

## 4. Characterization data of products 2

### Methyl 2-hydroxy-1-oxo-2,3-dihydro-1H-indene-2-carboxylate (2a)

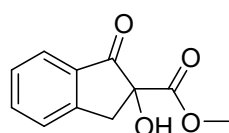

Compound was isolated as a white solid (99% yield, 20.4 mg) after column chromatography on silica-gel.  $^1\text{H}$  NMR (600 MHz, Chloroform- $d$ )  $\delta$  7.82 (d,  $J = 7.6$  Hz, 1H), 7.69 (t,  $J = 7.4$  Hz, 1H), 7.51 (d,  $J = 7.6$  Hz, 1H), 7.45 (t,  $J = 7.4$  Hz, 1H), 4.06 (s, 1H), 3.79 – 3.72 (m, 4H), 3.27 (d,  $J = 17.2$  Hz, 1H).  $^{13}\text{C}$  NMR (151 MHz,  $\text{CDCl}_3$ )  $\delta$  200.8, 171.9, 152.2, 136.2, 133.5, 128.2, 126.5, 125.3, 80.4, 53.5, 39.3. HRMS exact mass calcd for  $\text{C}_{11}\text{H}_{10}\text{O}_4\text{Na}^+$  ( $\text{M}+\text{Na}$ ) requires  $m/z$  229.0471. Found  $m/z$  229.0479.

### Ethyl 2-hydroxy-1-oxo-2,3-dihydro-1H-indene-2-carboxylate (2b)

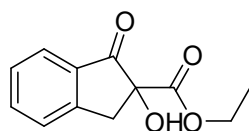

Compound was isolated as a white solid (97 % yield, 21.3 mg) after column chromatography on silica-gel. <sup>1</sup>H NMR (600 MHz, CDCl<sub>3</sub>) δ 7.82 (d, *J* = 7.7 Hz, 1H), 7.69 (t, *J* = 7.9 Hz, 1H), 7.51 (d, *J* = 7.7 Hz, 1H), 7.45 (t, *J* = 7.5 Hz, 1H), 4.23 (p, *J* = 7.1 Hz, 2H), 4.07 (s, 1H), 3.74 (d, *J* = 17.2 Hz, 1H), 3.27 (d, *J* = 17.2 Hz, 1H), 1.20 (t, *J* = 7.1 Hz, 1H). <sup>13</sup>C NMR (151 MHz, CDCl<sub>3</sub>) δ 201.0, 171.5, 152.3, 136.1, 133.6, 128.1, 126.5, 125.3, 80.3, 62.8, 39.3, 14.0. HRMS exact mass calcd for C<sub>12</sub>H<sub>12</sub>O<sub>4</sub>Na<sup>+</sup> (M+Na) requires *m/z* 243.0628. Found *m/z* 243.0631.

**Isopropyl 2-hydroxy-1-oxo-2,3-dihydro-1H-indene-2-carboxylate (2c)**

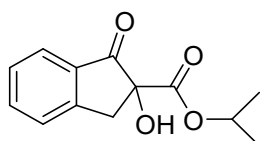

Compound was isolated as a white solid (94% yield, 22.0 mg) after column chromatography on silica-gel. <sup>1</sup>H NMR (500 MHz, Chloroform-*d*) δ 7.81 (d, *J* = 7.7 Hz, 1H), 7.67 (t, *J* = 7.5 Hz, 1H), 7.50 (d, *J* = 7.7 Hz, 1H), 7.44 (t, *J* = 7.5 Hz, 1H), 5.08 (p, *J* = 6.3 Hz, 1H), 4.05 (s, 1H), 3.70 (d, *J* = 17.2 Hz, 1H), 3.25 (d, *J* = 17.2 Hz, 1H), 1.21 (d, *J* = 6.3 Hz, 3H), 1.14 (d, *J* = 6.3 Hz, 3H). <sup>13</sup>C NMR (126 MHz, CDCl<sub>3</sub>) δ 201.0, 171.0, 152.3, 136.0, 133.7, 128.0, 126.4, 125.2, 80.3, 70.9, 39.3, 21.5, 21.3. HRMS exact mass calcd for C<sub>13</sub>H<sub>14</sub>O<sub>4</sub>Na<sup>+</sup> (M+Na) requires *m/z* 257.0784. Found *m/z* 257.0785.

**tert-butyl 2-hydroxy-1-oxo-2,3-dihydro-1H-indene-2-carboxylate (2d)**

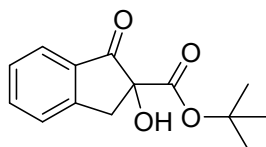

Compound was isolated as a white solid (96% yield, 23.8 mg) after column chromatography on silica-gel. <sup>1</sup>H NMR (600 MHz, Chloroform-*d*) δ 7.81 (d, *J* = 7.7 Hz, 1H), 7.66 (t, *J* = 7.5 Hz, 1H), 7.49 (d, *J* = 7.7 Hz, 1H), 7.43 (t, *J* = 7.5 Hz, 1H), 4.04 (s, 1H), 3.67 (d, *J* = 17.1 Hz, 1H), 3.24 (d, *J* = 17.1 Hz, 1H), 1.38 (s, 9H). <sup>13</sup>C NMR (151 MHz, CDCl<sub>3</sub>) δ 201.4, 170.5, 152.3, 135.9, 133.9, 127.9, 126.3, 125.1, 83.9, 80.5, 39.5, 27.7. HRMS exact mass calcd for C<sub>14</sub>H<sub>16</sub>O<sub>4</sub>Na<sup>+</sup> (M+Na) requires *m/z* 271.0941. Found *m/z* 271.0946.

**1-Adamantanyl 2-hydroxy-1-oxo-2,3-dihydro-1H-indene-2-carboxylate (2e)**

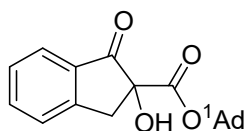

Compound was isolated as a white solid (96% yield, 31.2 mg) after column chromatography on silica-gel. <sup>1</sup>H NMR (600 MHz, Chloroform-*d*) δ 7.80 (d, *J* = 7.7 Hz, 1H), 7.65 (t, *J* = 7.4 Hz, 1H), 7.48 (d, *J* = 7.6 Hz, 1H), 7.42 (t, *J* = 7.5 Hz, 1H), 4.07 (s, 1H), 3.67 (d, *J* = 17.0 Hz, 1H), 3.23 (d, *J*

= 17.0 Hz, 1H), 2.13 (s, 3H), 1.98 (s, 6H), 1.61 (s, 6H). <sup>13</sup>C NMR (151 MHz, CDCl<sub>3</sub>) δ 201.5, 170.2, 152.4, 135.8, 134.0, 127.9, 126.3, 125.0, 83.9, 80.6, 40.9, 39.6, 35.9, 30.8. HRMS exact mass calcd for C<sub>20</sub>H<sub>22</sub>O<sub>4</sub>Na<sup>+</sup> (M+Na) requires *m/z* 349.1410. Found *m/z* 349.1411.

**2-Adamantanyl 2-hydroxy-1-oxo-2,3-dihydro-1H-indene-2-carboxylate (2f)**

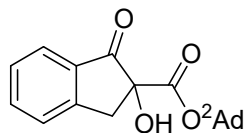

Compound was isolated as a pink solid (94% yield, 30.6 mg) after column chromatography on silica-gel. <sup>1</sup>H NMR (600 MHz, Chloroform-*d*) δ 7.82 (d, *J* = 7.7 Hz, 1H), 7.68 (t, *J* = 7.5 Hz, 1H), 7.52 (d, *J* = 7.7 Hz, 1H), 7.44 (t, *J* = 7.5 Hz, 1H), 4.97 (s, 1H), 4.05 (s, 1H), 3.73 (d, *J* = 16.9 Hz, 1H), 3.32 (d, *J* = 16.9 Hz, 1H), 1.88 – 1.55 (m, 10H), 1.44 – 1.25 (m, 4H). <sup>13</sup>C NMR (151 MHz, CDCl<sub>3</sub>) δ 201.1, 170.7, 152.0, 135.9, 134.1, 128.1, 126.3, 125.1, 81.0, 79.8, 39.6, 37.1, 36.1, 36.0, 31.7, 31.5, 31.5, 31.3, 26.8, 26.7. HRMS exact mass calcd for C<sub>20</sub>H<sub>22</sub>O<sub>4</sub>Na<sup>+</sup> (M+Na) requires *m/z* 349.1410. Found *m/z* 349.1417.

**Methyl 6-fluoro-2-hydroxy-1-oxo-2,3-dihydro-1H-indene-2-carboxylate (2g)**

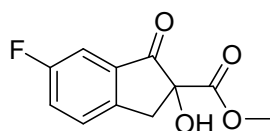

Compound was isolated as a white solid (97% yield, 21.7 mg) after column chromatography on silica-gel. <sup>1</sup>H NMR (600 MHz, Chloroform-*d*) δ 7.49 (dd, *J* = 8.4, 4.5 Hz, 1H), 7.45 (dd, *J* = 7.3, 2.5 Hz, 1H), 7.41 (td, *J* = 8.5, 2.5 Hz, 1H), 4.08 (s, 1H), 3.76 (s, 3H), 3.71 (d, *J* = 17.0 Hz, 1H), 3.23 (d, *J* = 17.0 Hz, 1H). <sup>13</sup>C NMR (150 MHz, CDCl<sub>3</sub>) δ 200.0, 171.6, 162.5(d, <sup>1</sup>*J*<sub>C-F</sub>=247.9), 147.6(d, <sup>4</sup>*J*<sub>C-F</sub>=2.1), 135.2(d, <sup>3</sup>*J*<sub>C-F</sub>=7.5), 127.9(d, <sup>3</sup>*J*<sub>C-F</sub>=7.83), 123.9(d, <sup>2</sup>*J*<sub>C-F</sub>=23.6), 111.0(d, <sup>2</sup>*J*<sub>C-F</sub>=22.0), 81.03, 53.58, 38.77. HRMS exact mass calcd for C<sub>11</sub>H<sub>9</sub>FO<sub>4</sub>Na<sup>+</sup> (M+Na) requires *m/z* 247.0377. Found *m/z* 247.0382.

**Methyl 5-fluoro-2-hydroxy-1-oxo-2,3-dihydro-1H-indene-2-carboxylate (2h)**

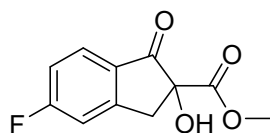

Compound was isolated as a brown solid (96% yield, 21.5 mg) after column chromatography on silica-gel. <sup>1</sup>H NMR (600 MHz, Chloroform-*d*) δ 7.83 (dd, *J* = 8.4, 5.3 Hz, 1H), 7.22 – 7.09 (m, 2H), 4.05 (s, 1H), 3.77 (s, 3H), 3.73 (d, *J* = 17.4 Hz, 1H), 3.26 (d, *J* = 17.4 Hz, 1H). <sup>13</sup>C NMR (150 MHz, CDCl<sub>3</sub>) δ 198.9, 171.6, 167.9(d, <sup>1</sup>*J*<sub>C-F</sub>=257.5), 155.2(d, <sup>3</sup>*J*<sub>C-F</sub>=10.2), 129.9(d, <sup>4</sup>*J*<sub>C-F</sub>=1.74), 127.8(d, <sup>3</sup>*J*<sub>C-F</sub>=10.7), 116.6(d, <sup>2</sup>*J*<sub>C-F</sub>=23.5), 113.4(d, <sup>2</sup>*J*<sub>C-F</sub>=22.6), 80.54, 53.56, 39.14. HRMS exact mass calcd for C<sub>11</sub>H<sub>9</sub>FO<sub>4</sub>Na<sup>+</sup> (M+Na) requires *m/z* 247.0377. Found *m/z* 247.0379.

**Methyl 6-chloro-2-hydroxy-1-oxo-2,3-dihydro-1*H*-indene-2-carboxylate (2i)**

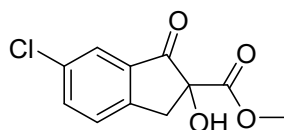

Compound was isolated as a white solid (97% yield, 23.2 mg) after column chromatography on silica-gel. <sup>1</sup>H NMR (600 MHz, Chloroform-*d*) δ 7.78 (d, *J* = 1.8 Hz, 1H), 7.65 (dd, *J* = 8.2, 2.0 Hz, 1H), 7.46 (d, *J* = 8.2 Hz, 1H), 4.05 (s, 1H), 3.77 (s, 3H), 3.71 (d, *J* = 17.3 Hz, 1H), 3.24 (d, *J* = 17.3 Hz, 1H). <sup>13</sup>C NMR (150 MHz, CDCl<sub>3</sub>) δ 199.6, 171.5, 150.2, 136.2, 135.0, 134.6, 127.7, 125.0, 80.8, 53.6, 38.9. HRMS exact mass calcd for C<sub>11</sub>H<sub>9</sub>ClO<sub>4</sub>Na<sup>+</sup> (M+Na) requires *m/z* 263.0082. Found *m/z* 263.0083.

**Methyl 5-chloro-2-hydroxy-1-oxo-2,3-dihydro-1*H*-indene-2-carboxylate (2j)**

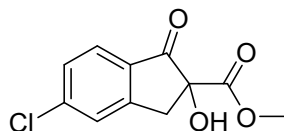

Compound was isolated as a white solid (99% yield, 23.7 mg) after column chromatography on silica-gel. <sup>1</sup>H NMR (600 MHz, Chloroform-*d*) δ 7.75 (d, *J* = 8.2 Hz, 1H), 7.51 (s, 1H), 7.43 (d, *J* = 8.1 Hz, 1H), 4.08 (s, 1H), 3.76 (s, 3H), 3.72 (d, *J* = 17.4 Hz, 1H), 3.25 (d, *J* = 17.4 Hz, 1H). <sup>13</sup>C NMR (151 MHz, CDCl<sub>3</sub>) δ 199.4, 171.5, 153.5, 142.9, 132.0, 129.1, 126.8, 126.4, 80.4, 53.6, 39.0. HRMS exact mass calcd for C<sub>11</sub>H<sub>9</sub>ClO<sub>4</sub>Na<sup>+</sup> (M+Na) requires *m/z* 263.0082. Found *m/z* 263.0082.

**Methyl 6-bromine-2-hydroxy-1-oxo-2,3-dihydro-1*H*-indene-2-carboxylate (2k)**

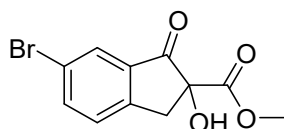

Compound was isolated as a white solid (98% yield, 27.8 mg) after column chromatography on silica-gel. <sup>1</sup>H NMR (600 MHz, Chloroform-*d*) δ 7.94 (s, 1H), 7.79 (d, *J* = 10.1 Hz, 1H), 7.41 (d, *J* = 8.2 Hz, 1H), 4.03 (s, 1H), 3.77 (s, 3H), 3.69 (d, *J* = 17.3 Hz, 1H), 3.21 (d, *J* = 17.4 Hz, 1H). <sup>13</sup>C NMR (150 MHz, CDCl<sub>3</sub>) δ 199.5, 171.5, 150.7, 138.9, 135.4, 128.1, 128.0, 122.3, 80.6, 53.6, 38.9. HRMS exact mass calcd for C<sub>11</sub>H<sub>9</sub>BrO<sub>4</sub>Na<sup>+</sup> (M+Na) requires *m/z* 306.9576. Found *m/z* 306.9579

**Methyl 4-bromine-2-hydroxy-1-oxo-2,3-dihydro-1*H*-indene-2-carboxylate (2l)**

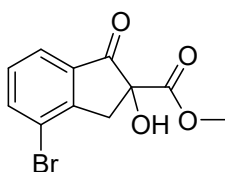

Compound was isolated as a white solid (84% yield, 23.8 mg) after column chromatography on silica-gel. <sup>1</sup>H NMR (600 MHz, Chloroform-*d*) δ 7.86 (d, *J* = 7.7 Hz, 1H), 7.78 (d, *J* = 7.4 Hz, 1H),

7.37 (t,  $J = 7.5$  Hz, 1H), 4.04 (s, 1H), 3.79 (s, 3H), 3.69 (d,  $J = 17.8$  Hz, 1H), 3.20 (d,  $J = 17.7$  Hz, 1H).  $^{13}\text{C}$  NMR (151 MHz,  $\text{CDCl}_3$ )  $\delta$  200.2, 171.5, 151.9, 138.9, 135.5, 129.9, 124.1, 121.9, 80.0, 53.7, 40.4. HRMS exact mass calcd for  $\text{C}_{11}\text{H}_9\text{BrO}_4\text{Na}^+$  ( $\text{M}+\text{Na}$ ) requires  $m/z$  306.9576. Found  $m/z$  306.9581.

**Methyl 5-methoxy-2-hydroxy-1-oxo-2,3-dihydro-1H-indene-2-carboxylate (2m)**

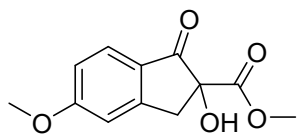

Compound was isolated as a white solid (97% yield, 22.9 mg) after column chromatography on silica-gel.  $^1\text{H}$  NMR (600 MHz, Chloroform- $d$ )  $\delta$  7.75 (d,  $J = 8.6$  Hz, 1H), 6.96 (d,  $J = 8.6$  Hz, 1H), 6.93 (s, 1H), 4.60 (s, 1H), 3.93 (s, 4H), 3.81 (s, 3H), 3.66 (d,  $J = 17.6$  Hz, 1H), 3.54 (d,  $J = 17.6$  Hz, 1H).  $^{13}\text{C}$  NMR (151 MHz,  $\text{CDCl}_3$ )  $\delta$  193.31, 169.46, 166.70, 155.02, 127.37, 126.92, 116.53, 109.76, 91.02, 55.88, 53.16, 36.76. HRMS exact mass calcd for  $\text{C}_{12}\text{H}_{12}\text{O}_5\text{Na}^+$  ( $\text{M}+\text{Na}$ ) requires  $m/z$  259.0577. Found  $m/z$  259.0578.

**Methyl 5,6-dimethoxy-2-hydroxy-1-oxo-2,3-dihydro-1H-indene-2-carboxylate (2n)**

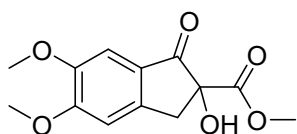

Compound was isolated as a white solid (87% yield, 23.1 mg) after column chromatography on silica-gel.  $^1\text{H}$  NMR (600 MHz, Chloroform- $d$ )  $\delta$  7.19 (s, 1H), 6.90 (s, 1H), 4.08 (s, 1H), 3.99 (s, 3H), 3.91 (s, 3H), 3.74 (s, 3H), 3.64 (d,  $J = 16.9$  Hz, 1H), 3.16 (d,  $J = 16.9$  Hz, 1H).  $^{13}\text{C}$  NMR (151 MHz,  $\text{CDCl}_3$ )  $\delta$  199.1, 172.2, 156.8, 150.0, 148.1, 126.1, 107.3, 105.4, 80.8, 56.4, 56.1, 53.4, 39.0. HRMS exact mass calcd for  $\text{C}_{13}\text{H}_{14}\text{O}_6\text{Na}^+$  ( $\text{M}+\text{Na}$ ) requires  $m/z$  289.0683. Found  $m/z$  289.0685.

**Methyl 6-methyl-2-hydroxy-1-oxo-2,3-dihydro-1H-indene-2-carboxylate (2o)**

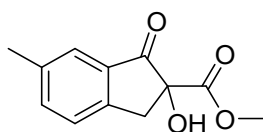

Compound was isolated as a white solid (93% yield, 20.4 mg) after column chromatography on silica-gel.  $^1\text{H}$  NMR (600 MHz, Chloroform- $d$ )  $\delta$  7.61 (s, 1H), 7.50 (d,  $J = 7.8$  Hz, 1H), 7.39 (d,  $J = 7.8$  Hz, 1H), 4.02 (s, 1H), 3.75 (s, 3H), 3.70 (d,  $J = 17.1$  Hz, 1H), 3.22 (d,  $J = 17.1$  Hz, 1H), 2.43 (s, 3H).  $^{13}\text{C}$  NMR (151 MHz,  $\text{CDCl}_3$ )  $\delta$  200.9, 172.0, 149.6, 138.3, 137.5, 133.7, 126.1, 125.2, 80.7, 53.4, 39.0, 21.1. HRMS exact mass calcd for  $\text{C}_{12}\text{H}_{12}\text{O}_4\text{Na}^+$  ( $\text{M}+\text{Na}$ ) requires  $m/z$  243.0628. Found  $m/z$  243.0630.

**tert-butyl-2-hydroxy-3-oxo-2,3-dihydrobenzofuran-2-carboxylate (2p)**

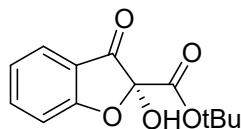

Compound was isolated as a yellow solid (93% yield, 23.2 mg) after column chromatography on silica-gel.  $^1\text{H}$  NMR (600 MHz,  $\text{CDCl}_3$ )  $\delta$  7.70 (d,  $J = 7.7$  Hz, 1H), 7.69 – 7.65 (m, 1H), 7.16 (d,  $J = 7.6$  Hz, 1H), 7.13 (d,  $J = 8.2$  Hz, 1H), 5.21 (s, 1H), 1.44 (s, 9H).  $^{13}\text{C}$  NMR (151 MHz,  $\text{CDCl}_3$ )  $\delta$  194.3, 171.5, 165.8, 138.9, 125.1, 122.8, 119.1, 113.3, 97.9, 86.0, 27.6. HRMS exact mass calcd for  $\text{C}_{13}\text{H}_{14}\text{O}_5\text{Na}^+$  ( $\text{M}+\text{Na}$ ) requires  $m/z$  273.0733. Found  $m/z$  273.0735.

**Methyl 2-hydroxy-1-oxo-1,2,3,4-tetrahydronaphthalene-2-carboxylate (2q)**

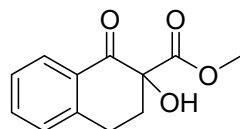

Compound was isolated as a colorless oil (89% yield, 19.6 mg) after column chromatography on silica-gel.  $^1\text{H}$  NMR (600 MHz, Chloroform- $d$ )  $\delta$  8.04 (d,  $J = 7.8$  Hz, 1H), 7.53 (t,  $J = 7.5$  Hz, 1H), 7.34 (t,  $J = 7.6$  Hz, 1H), 7.29 – 7.25 (m, 1H), 4.41 (s, 1H), 3.74 (s, 3H), 3.13 (q,  $J = 4.4, 4.0$  Hz, 2H), 2.71 (dt,  $J = 13.5, 5.1$  Hz, 1H), 2.25 (ddd,  $J = 14.8, 8.9, 6.3$  Hz, 1H).  $^{13}\text{C}$  NMR (151 MHz,  $\text{CDCl}_3$ )  $\delta$  194.5, 171.1, 144.0, 134.4, 130.1, 128.9, 128.2, 127.0, 77.7, 53.0, 32.7, 21.0. HRMS exact mass calcd for  $\text{C}_{12}\text{H}_{12}\text{O}_4\text{Na}^+$  ( $\text{M}+\text{Na}$ ) requires  $m/z$  243.0628. Found  $m/z$  243.0636.

**(R)-Ethyl 1-Hydroxy-2-oxocyclohexane-1-carboxylate (2r)**

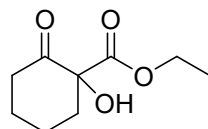

Compound was isolated as a colourless oil (76 % yield, 14.1 mg) after column chromatography on silica-gel.  $^1\text{H}$  NMR (600 MHz, Chloroform- $d$ )  $\delta$  4.35 (s, 1H), 4.23 (q,  $J = 7.2$  Hz, 2H), 2.66 (dtd,  $J = 14.1, 4.5, 1.5$  Hz, 1H), 2.60 (dddd,  $J = 13.5, 4.7, 3.6, 2.3$  Hz, 1H), 2.55 (ddd,  $J = 14.1, 11.8, 6.0$  Hz, 1H), 2.03 (ddtt,  $J = 14.3, 8.3, 4.5, 2.3$  Hz, 1H), 1.88 – 1.77 (m, 2H), 1.74 – 1.64 (m, 2H), 1.28 (t,  $J = 7.1$  Hz, 3H).  $^{13}\text{C}$  NMR (151 MHz,  $\text{CDCl}_3$ )  $\delta$  207.3, 170.1, 80.7, 62.0, 38.9, 37.6, 27.0, 21.9, 14.0. HRMS exact mass calcd for  $\text{C}_9\text{H}_{14}\text{O}_4\text{Na}^+$  ( $\text{M}+\text{Na}$ ) requires  $m/z$  209.0784. Found  $m/z$  209.0789.

**2-hydroxy-1-oxo-N-phenyl-2,3-dihydro-1H-indene-2-carboxamide (2s)**

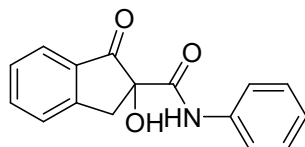

Compound was isolated as a brown solid (96% yield, 25.6 mg) after column chromatography on silica-gel. mp: 128-130 °C.  $^1\text{H}$  NMR (600 MHz, Chloroform- $d$ )  $\delta$  8.79 (s, 1H), 7.81 (d,  $J = 7.7$  Hz, 1H), 7.70 (td,  $J = 7.6, 1.1$  Hz, 1H), 7.56 – 7.51 (m, 3H), 7.44 (t,  $J = 7.5$  Hz, 1H), 7.34 – 7.29 (m,





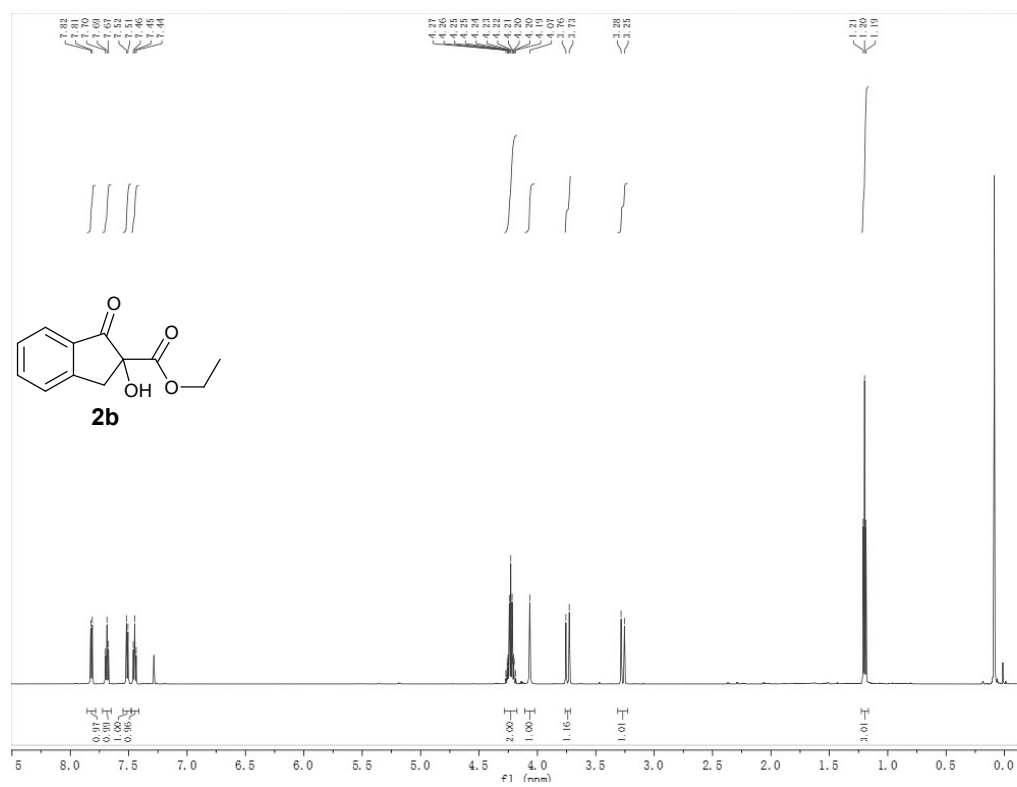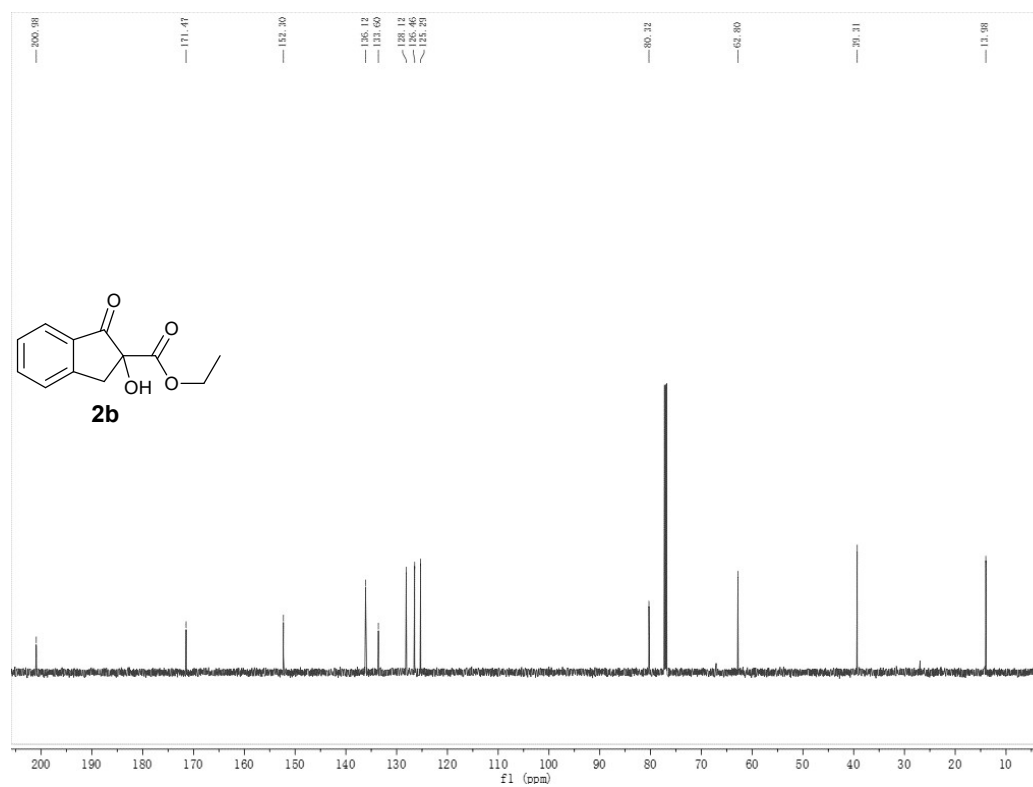



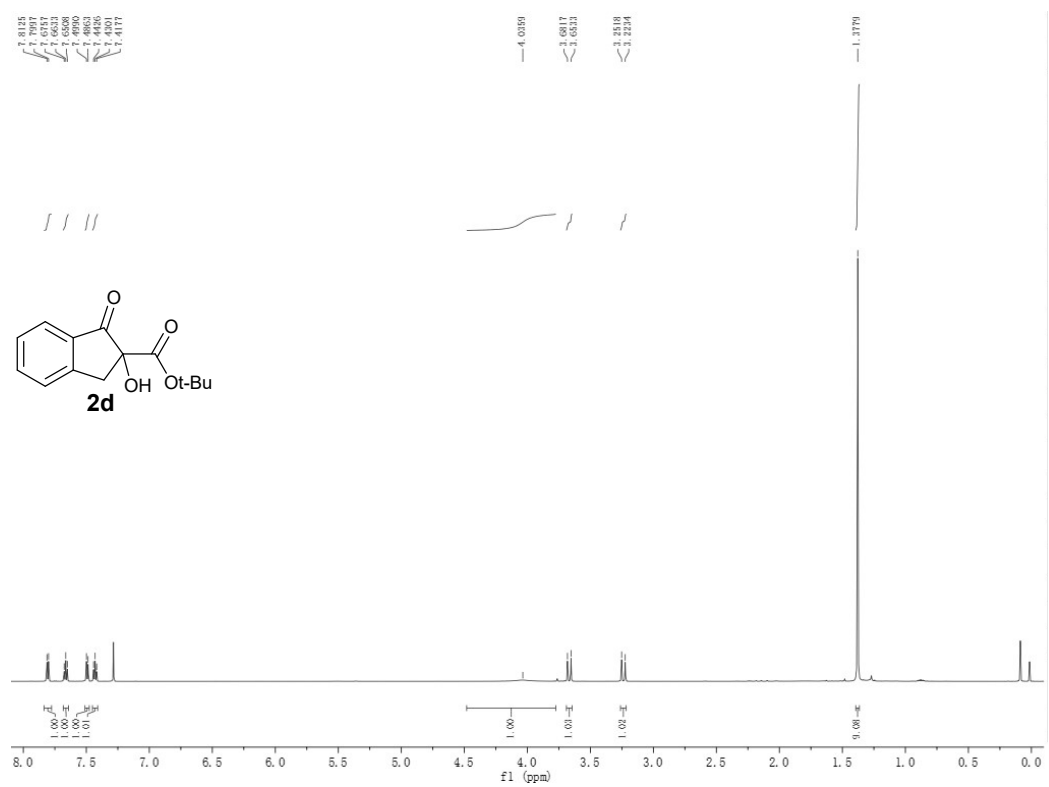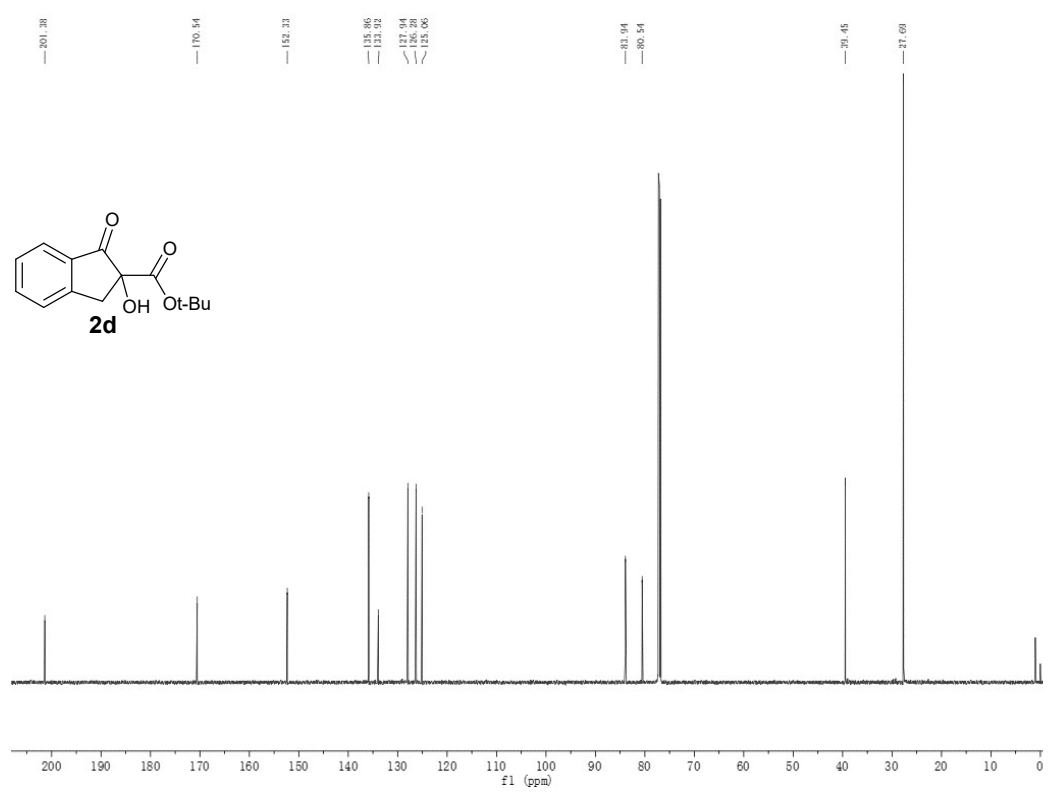

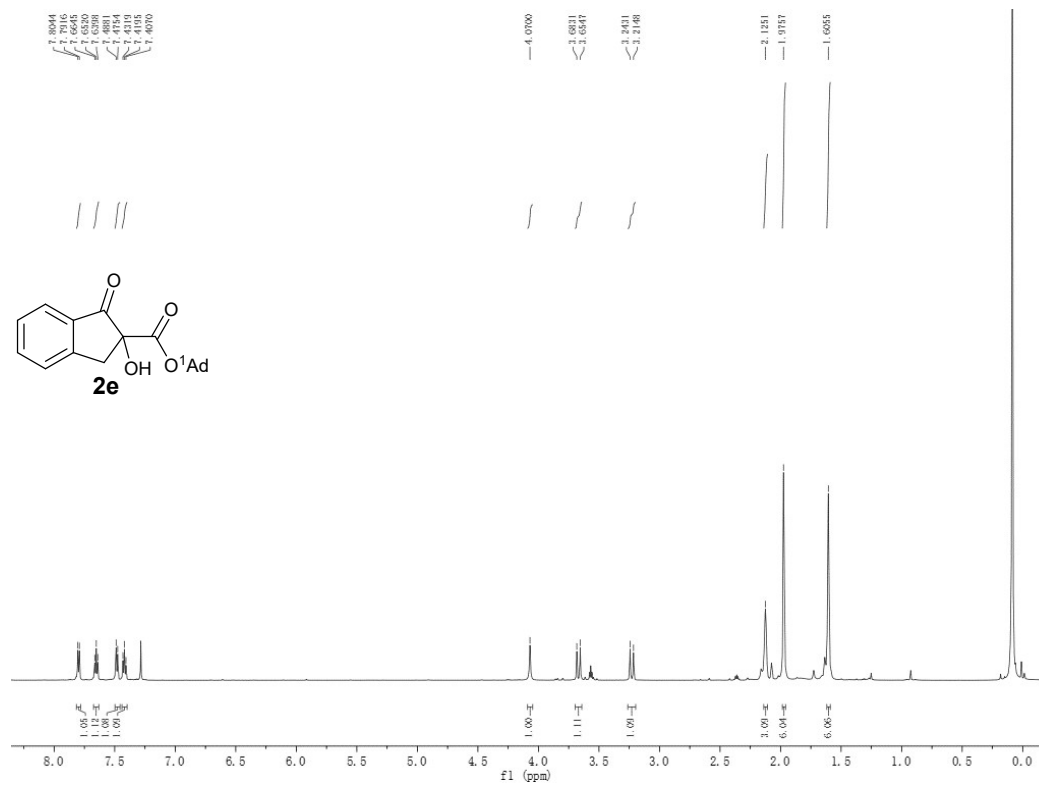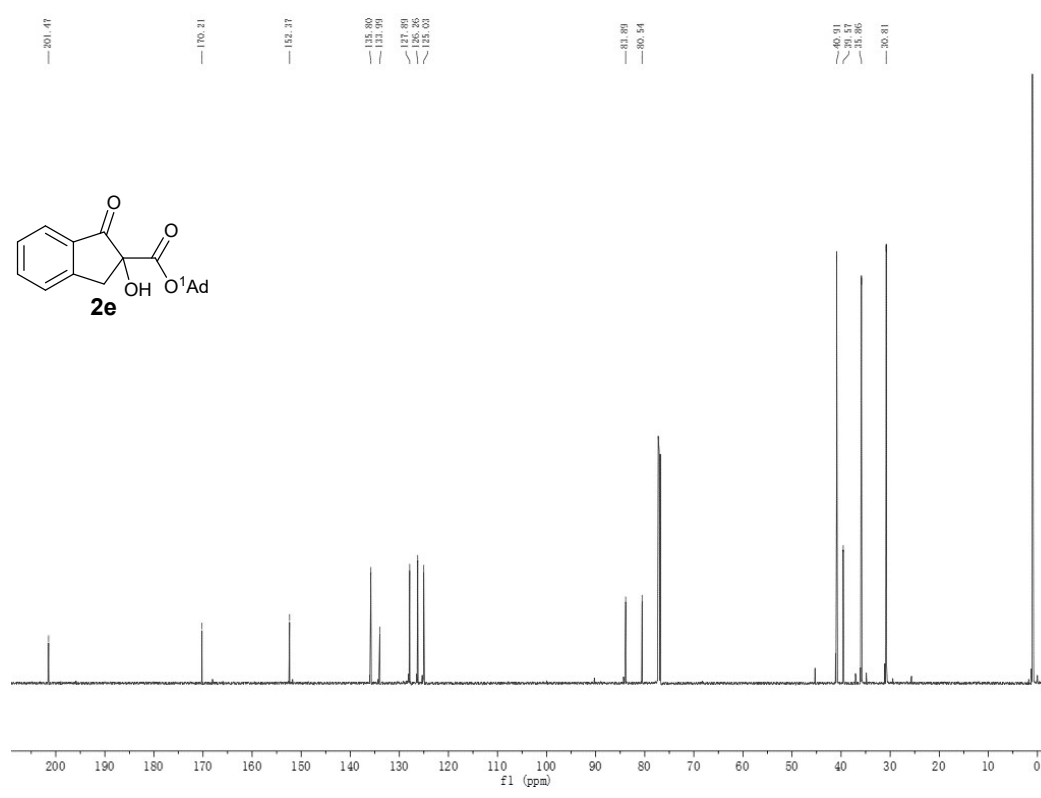

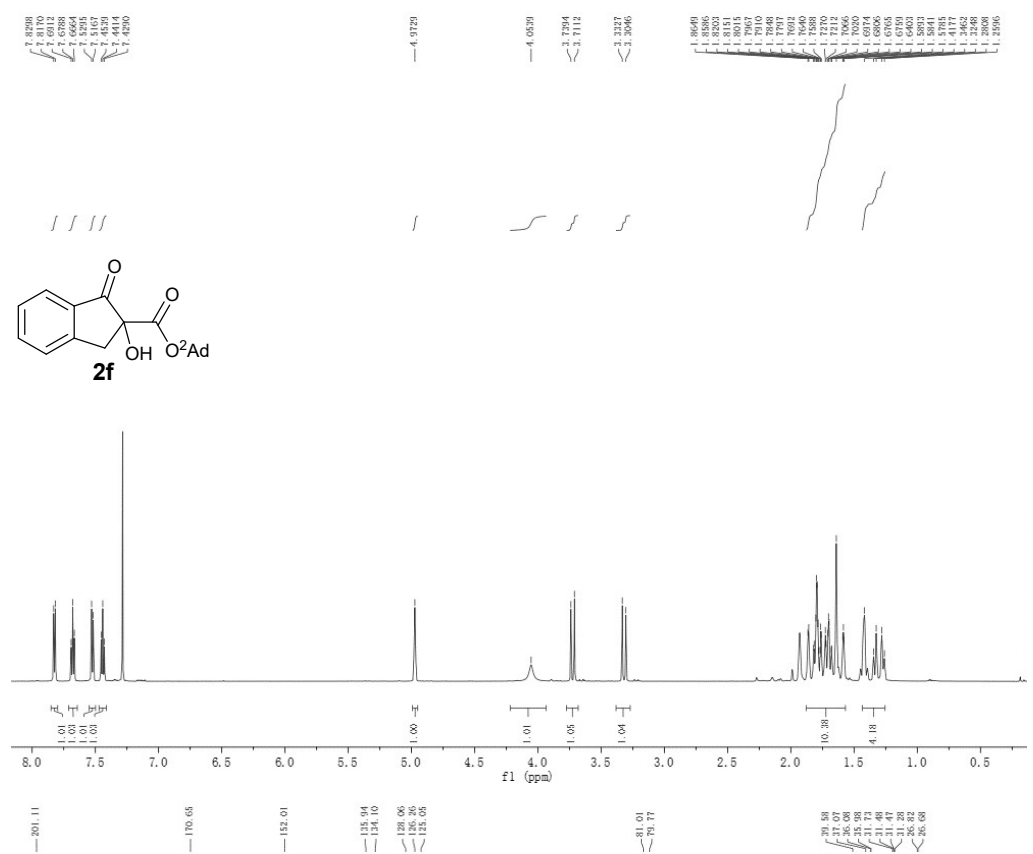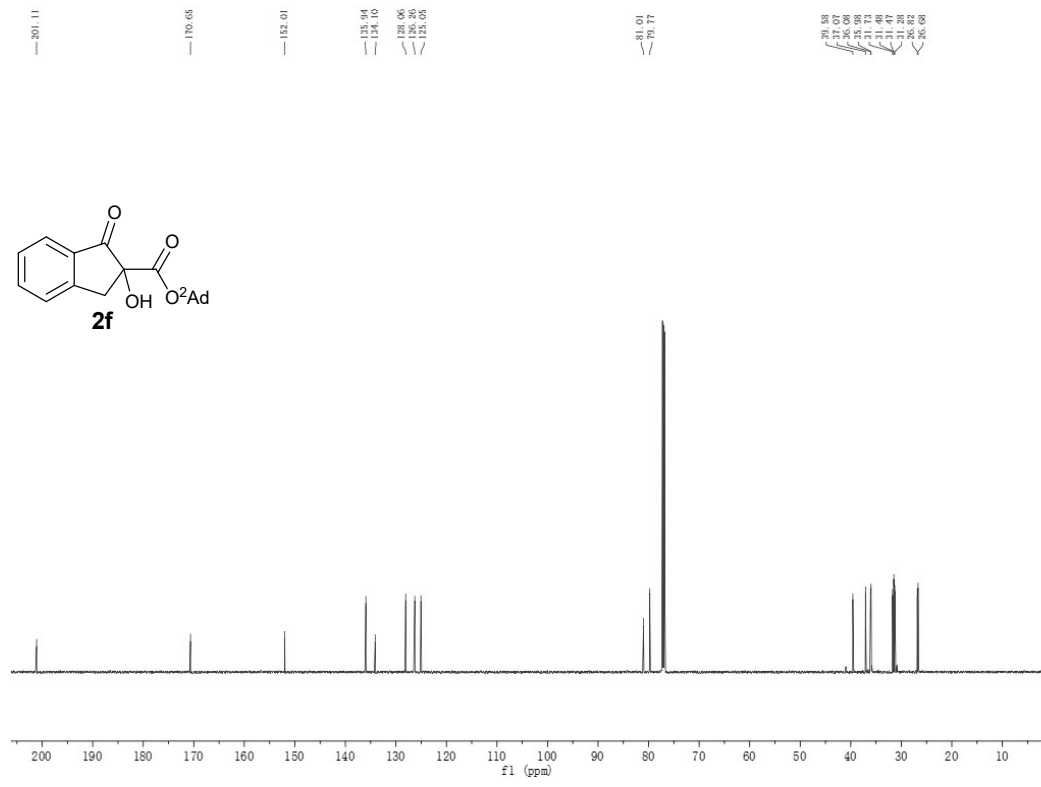



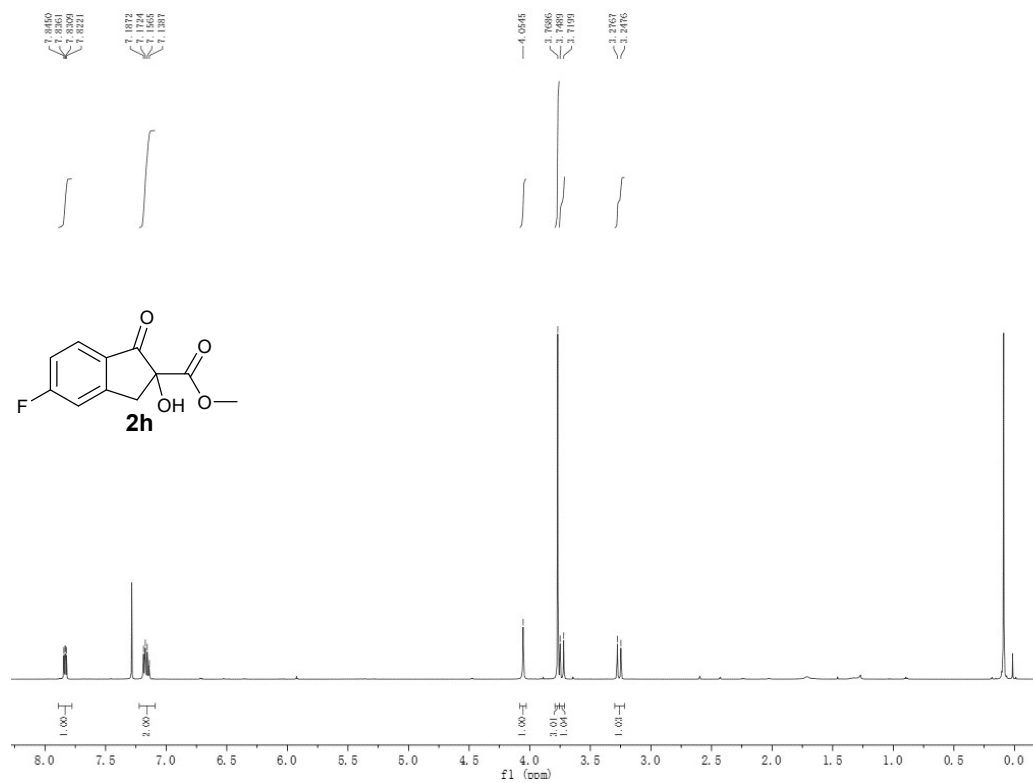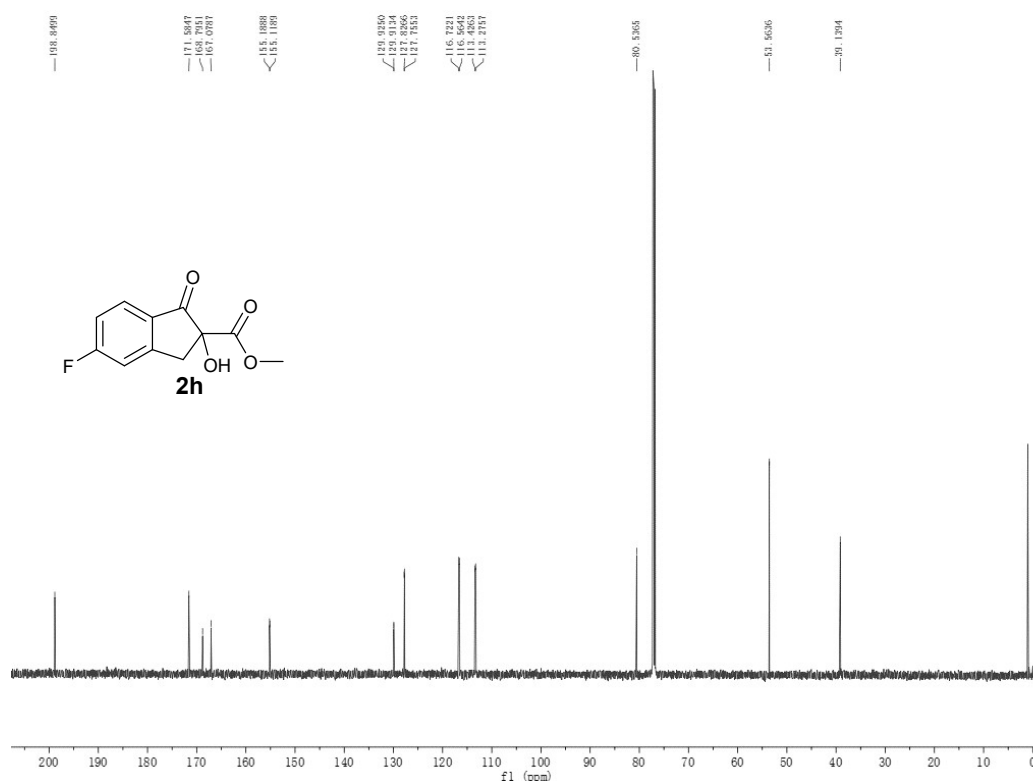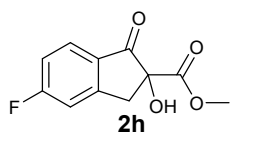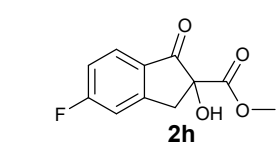

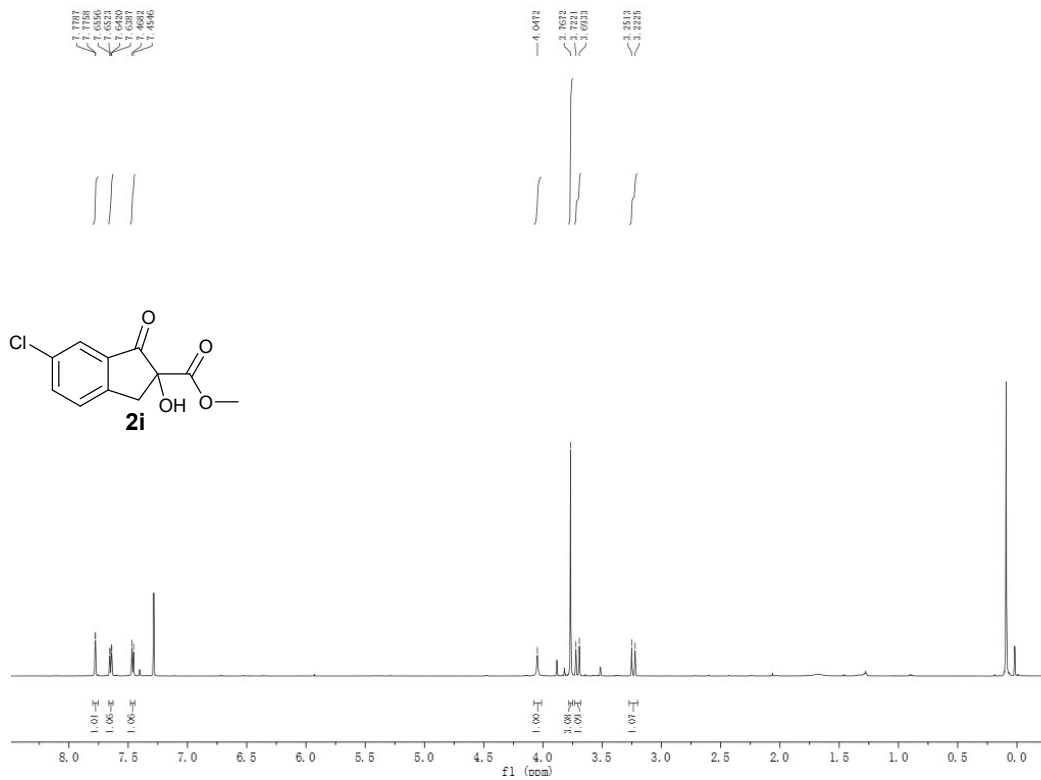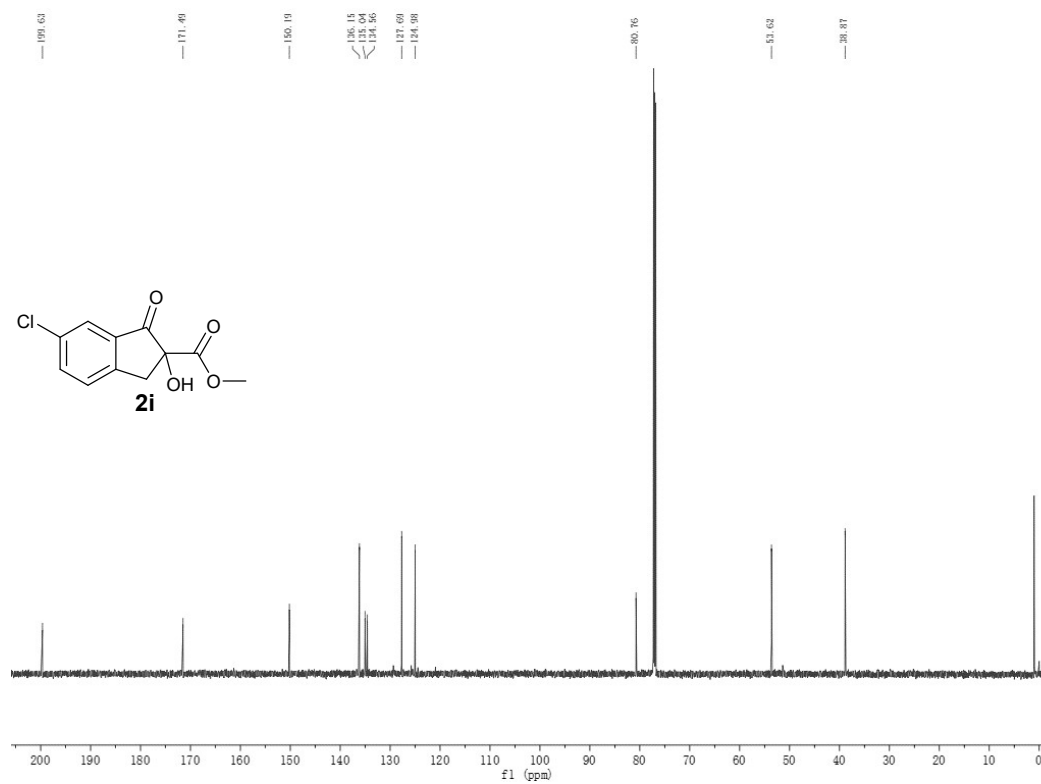



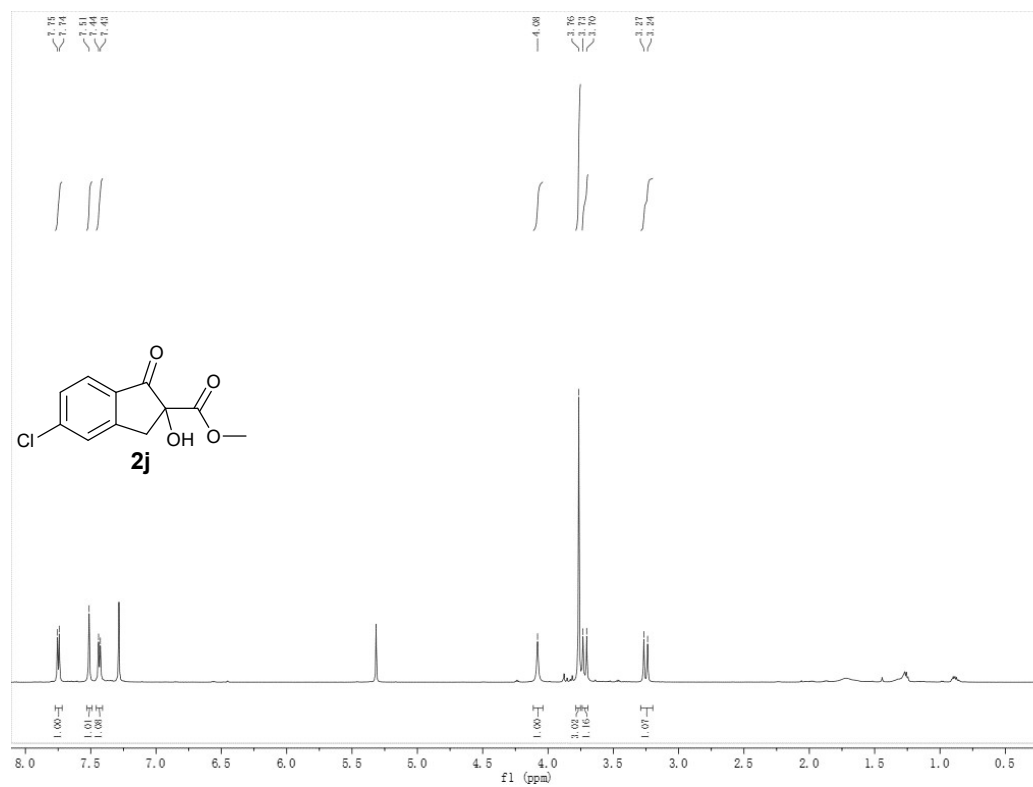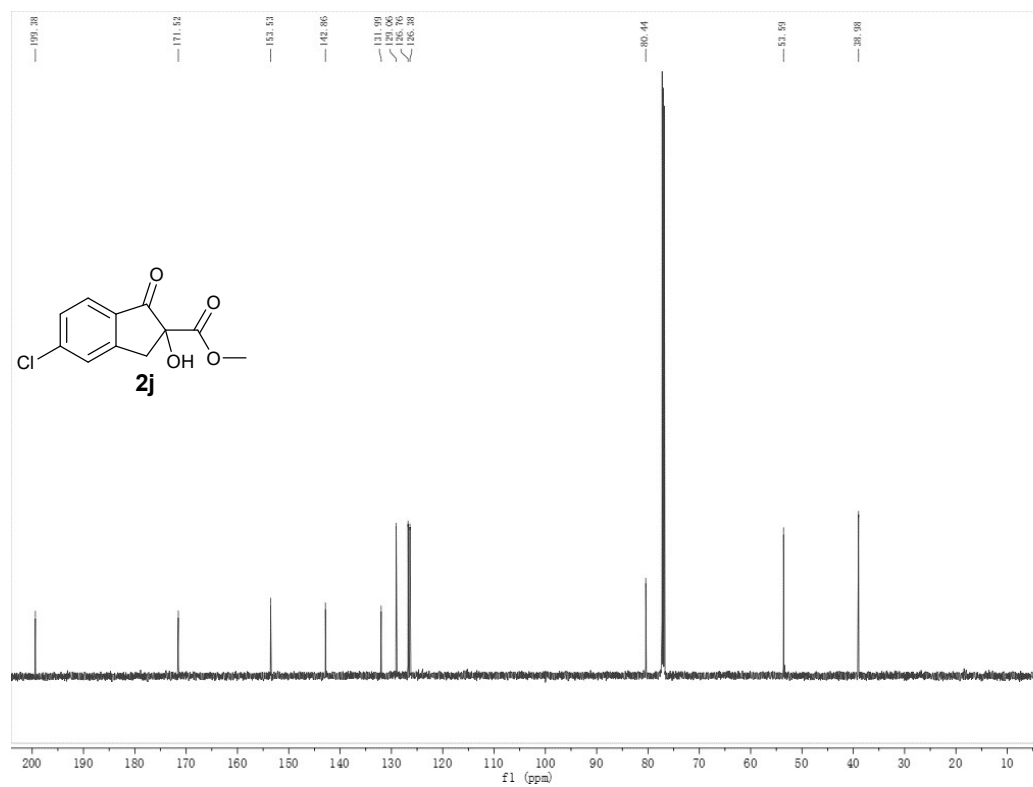

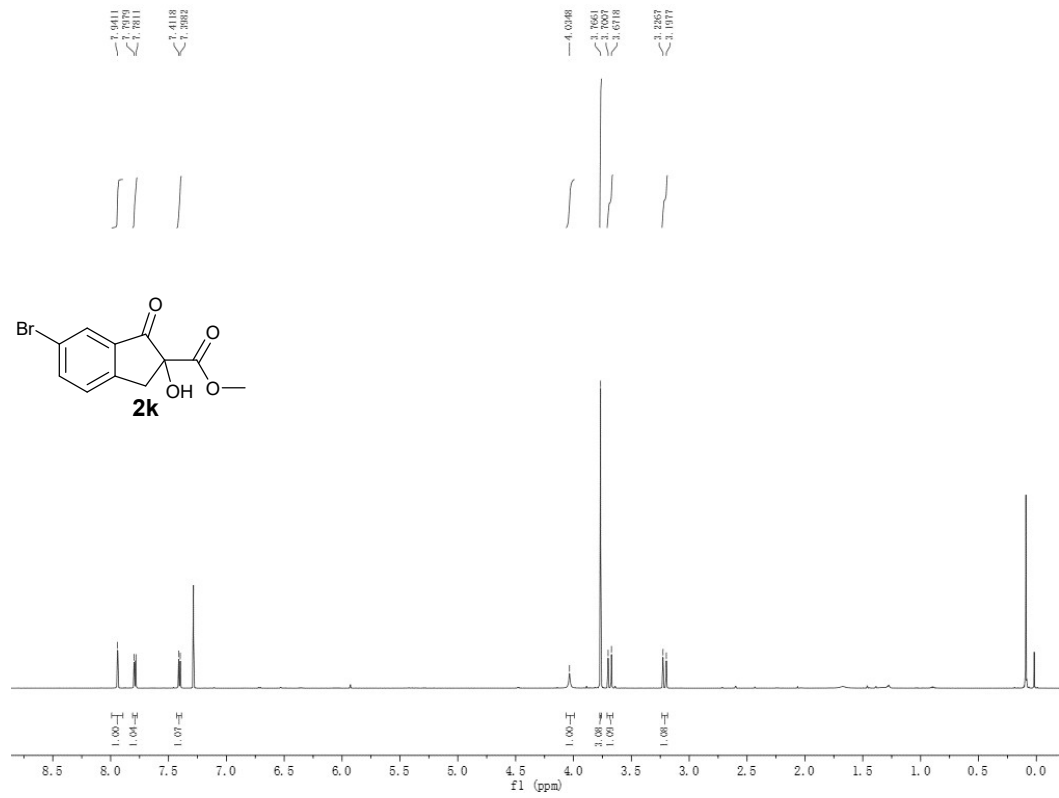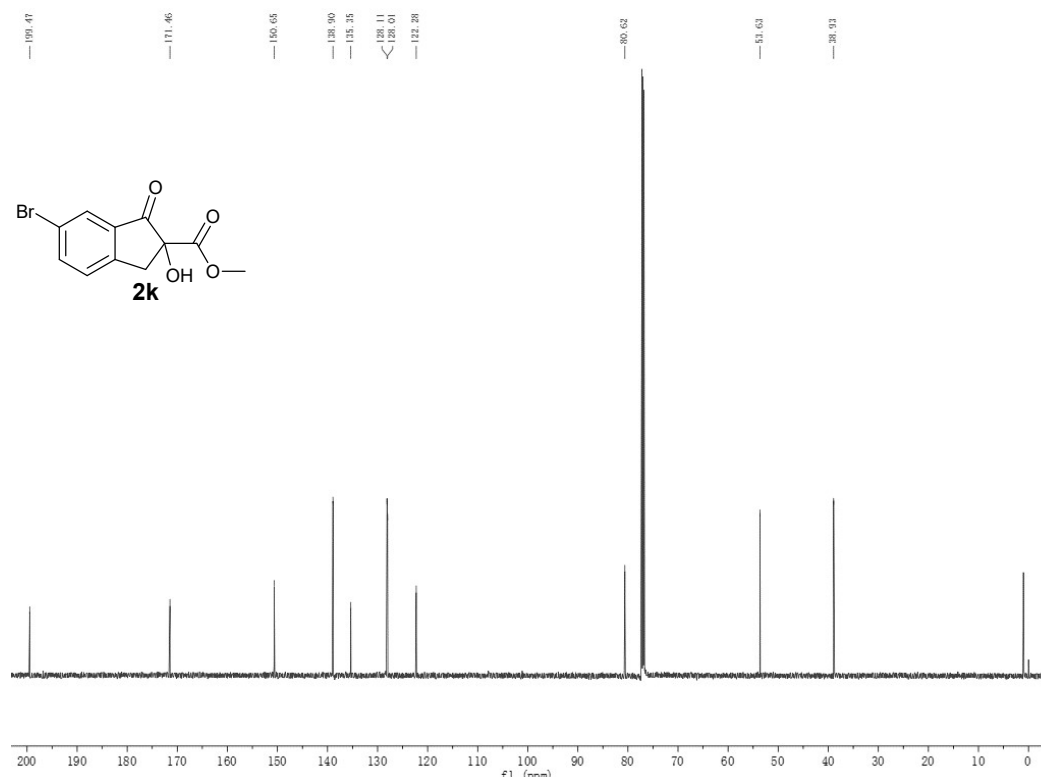

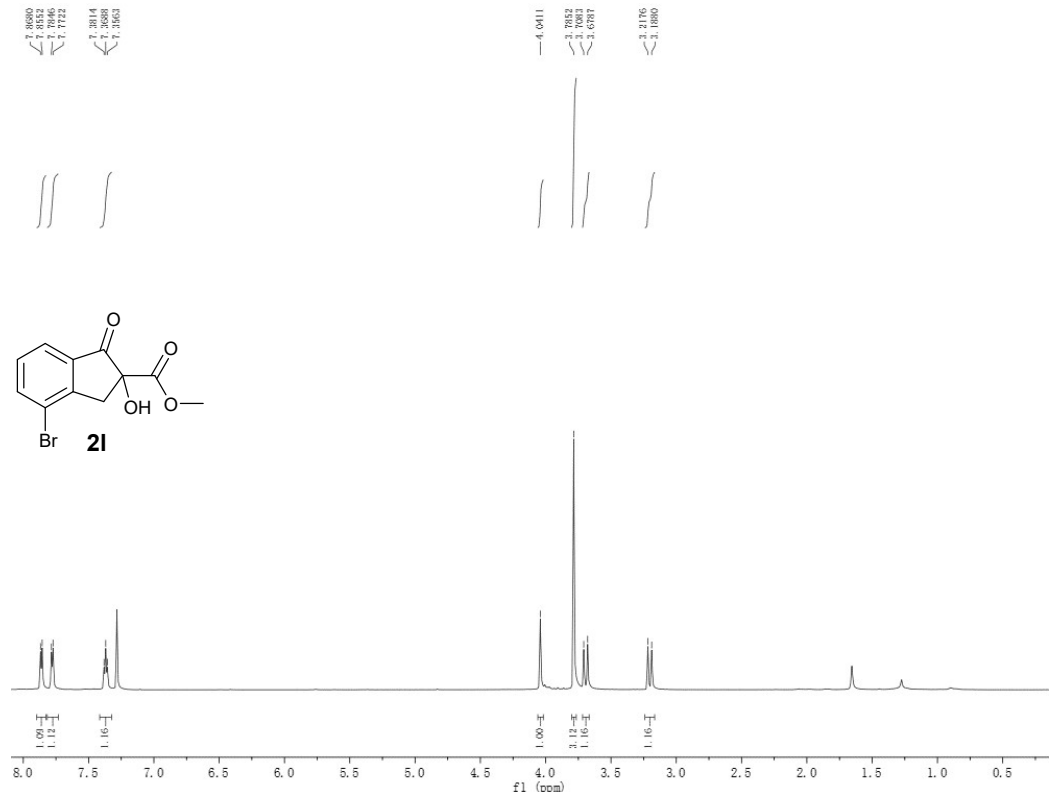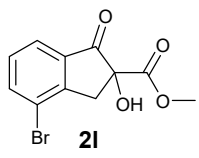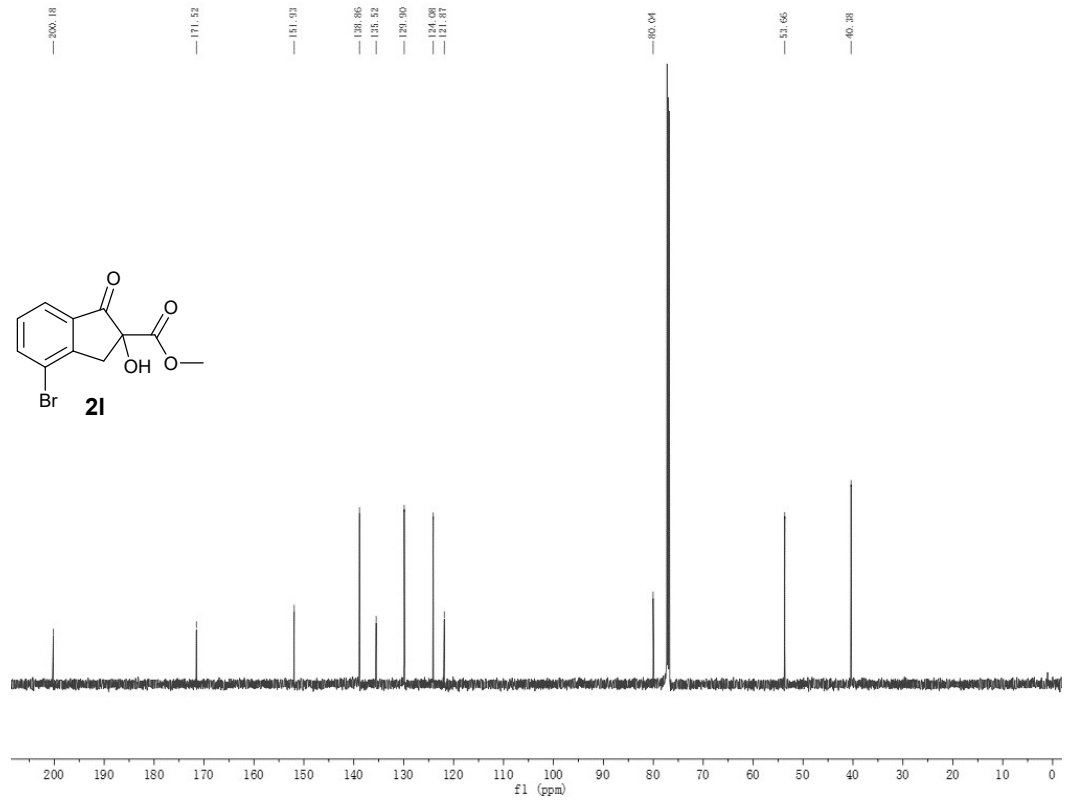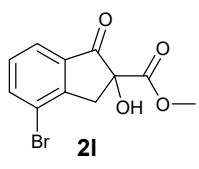

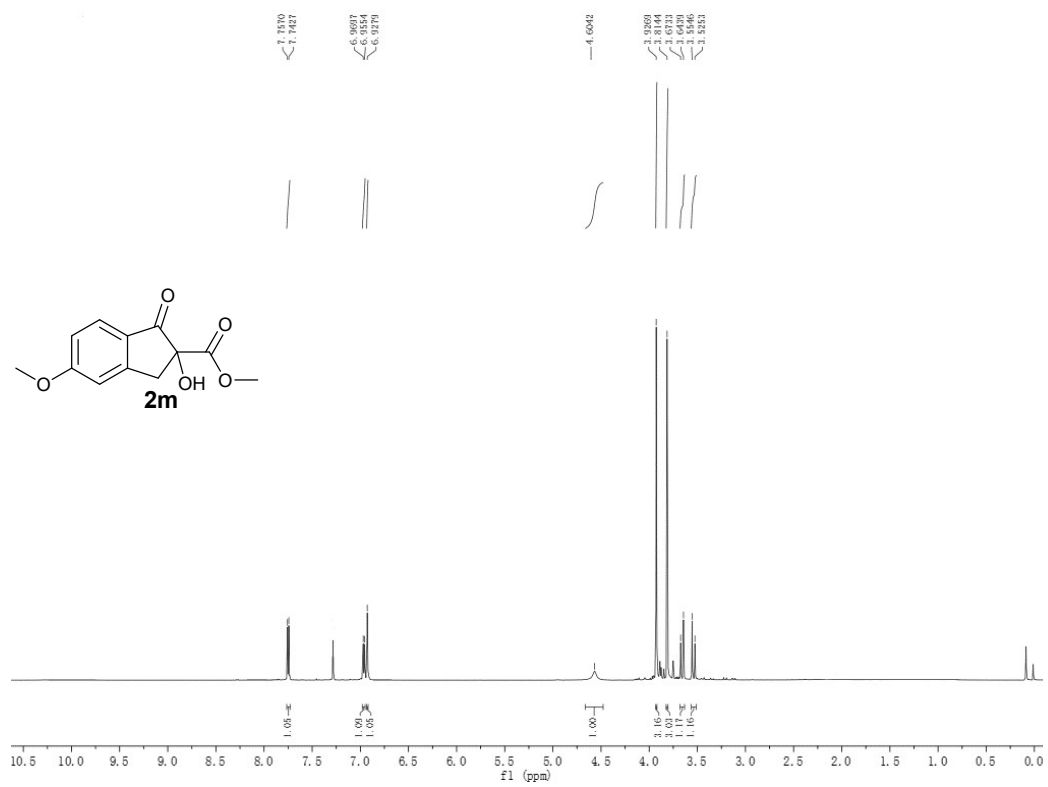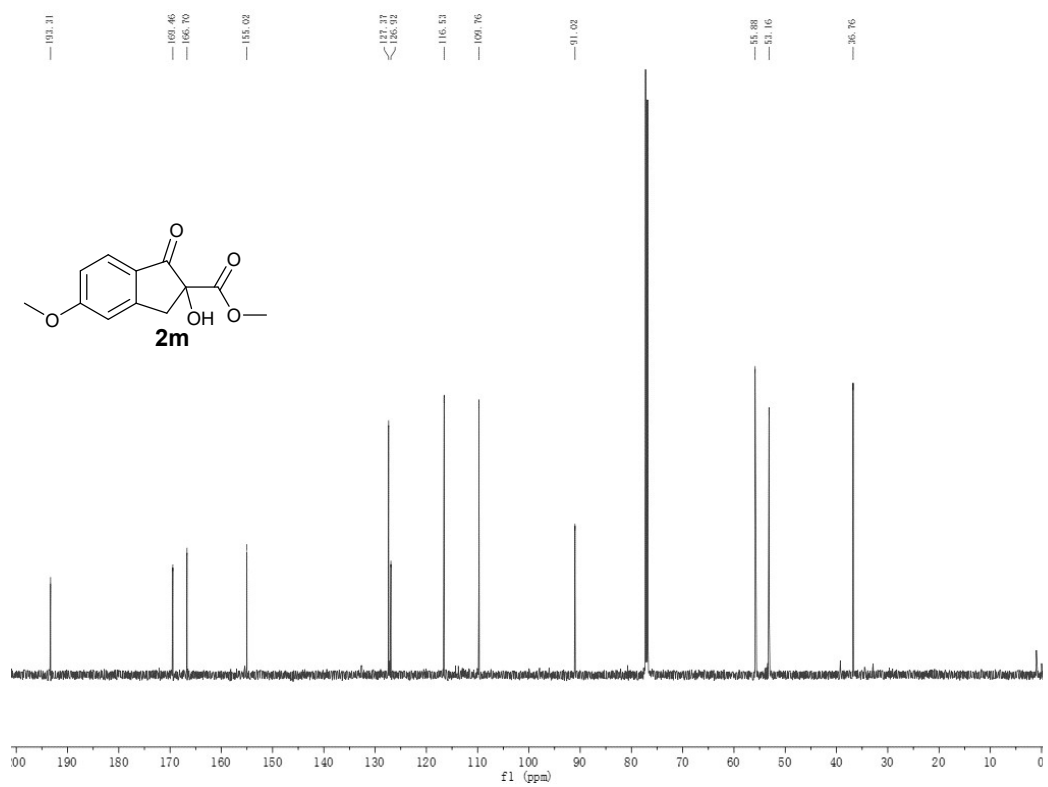

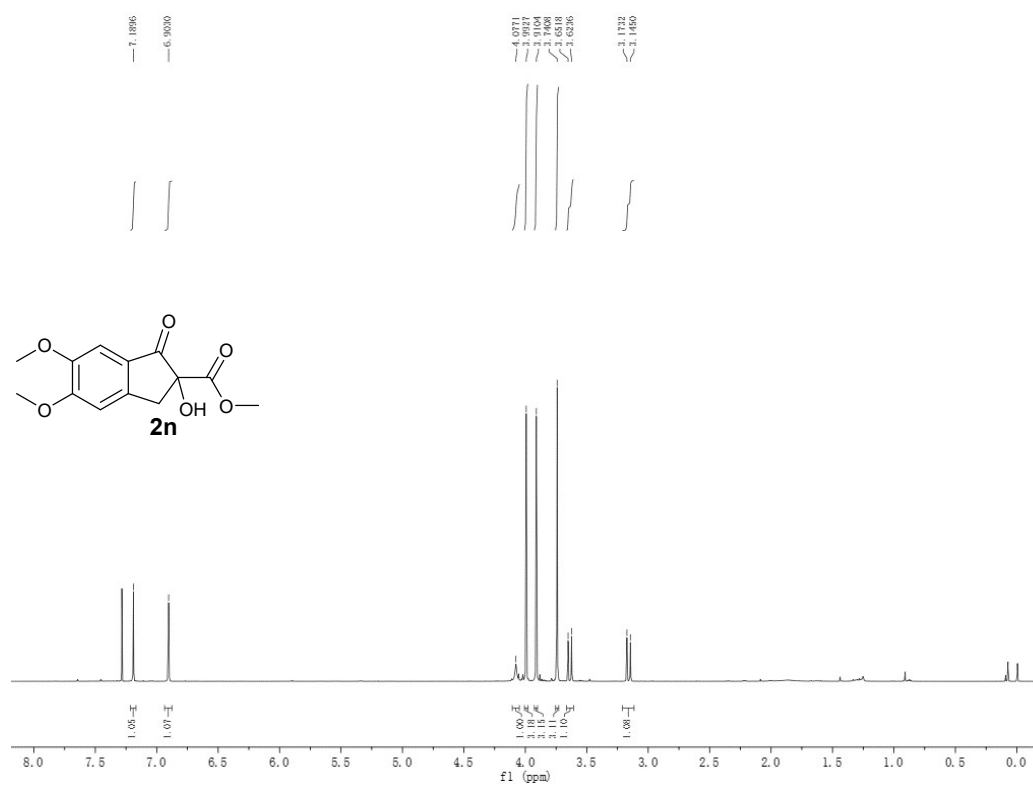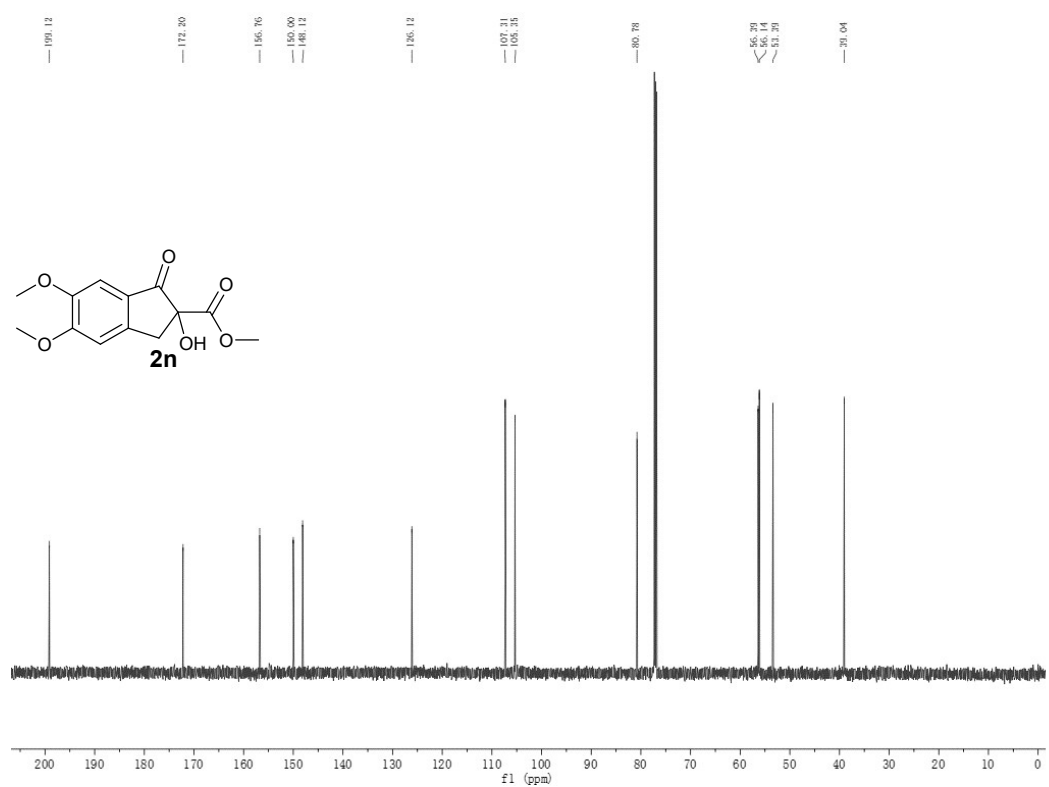

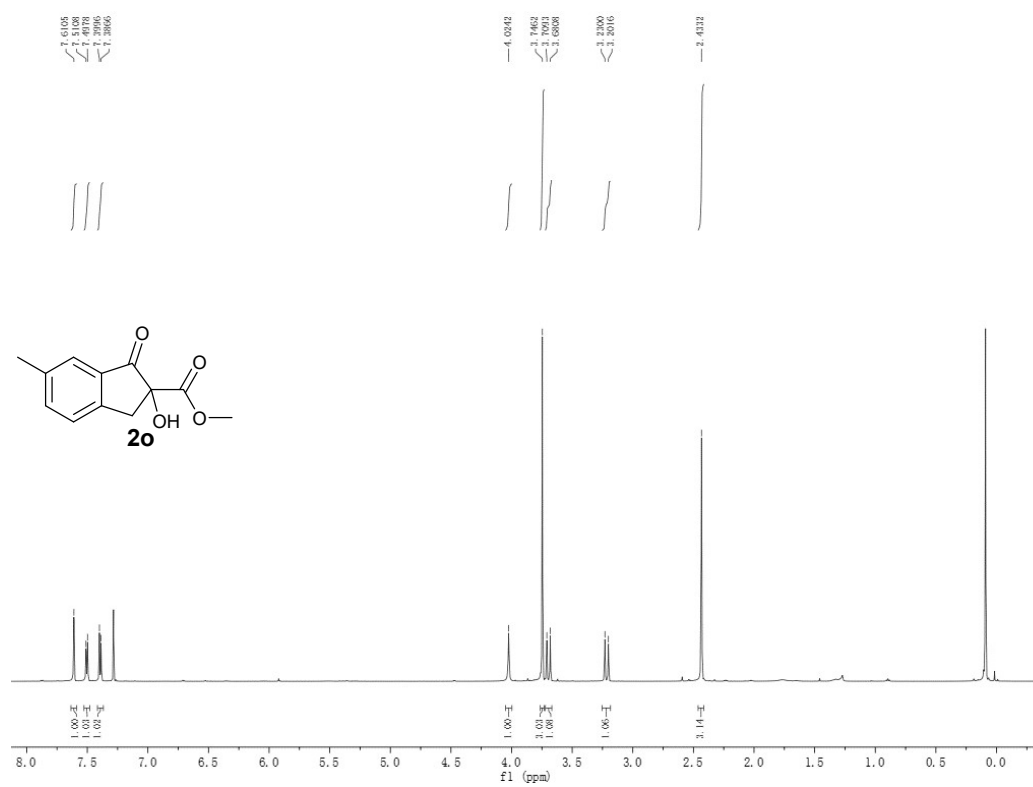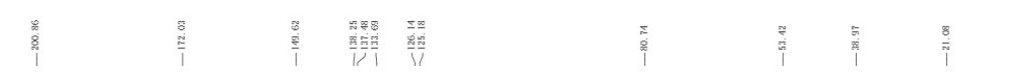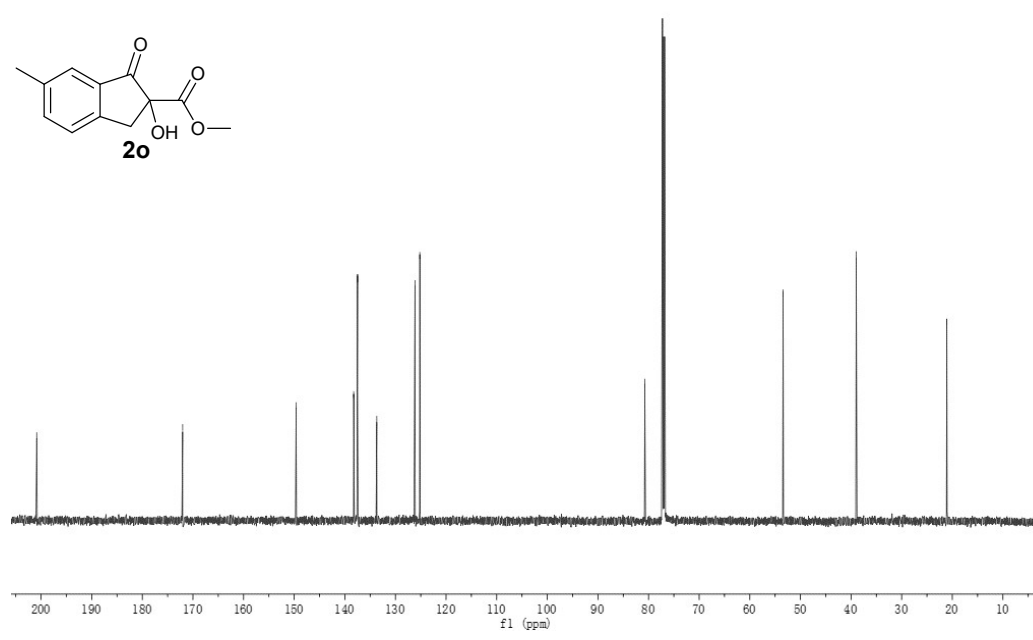

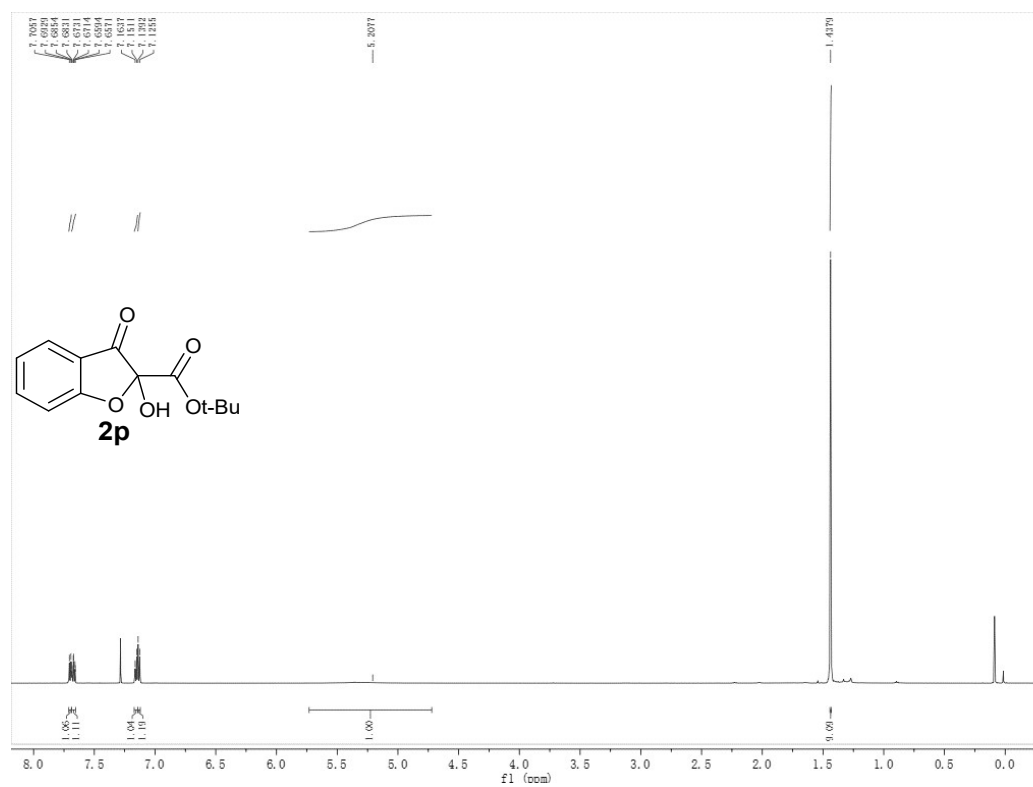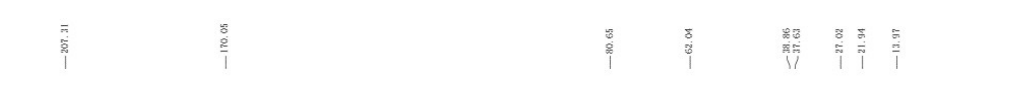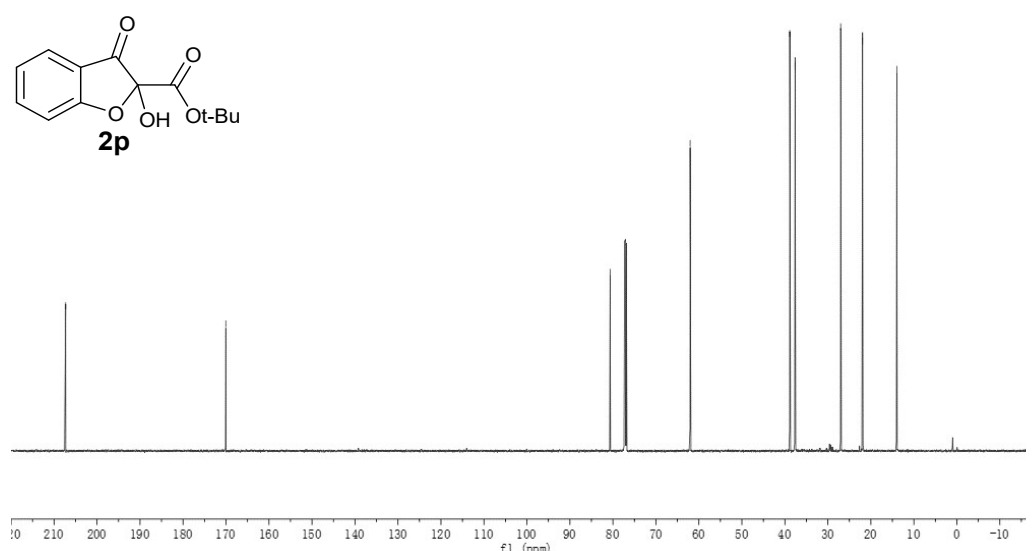

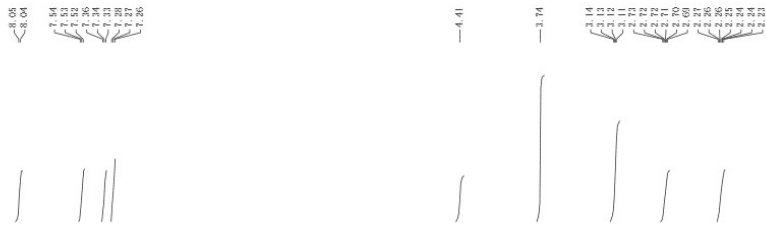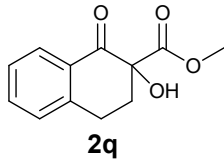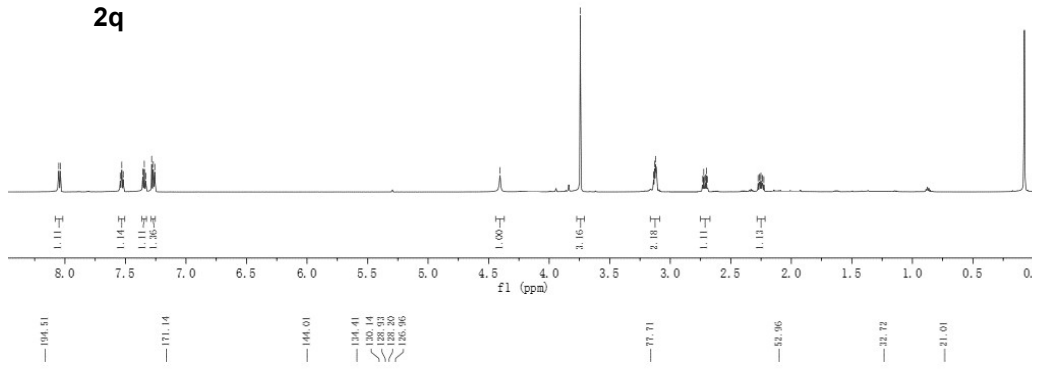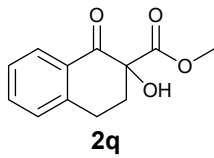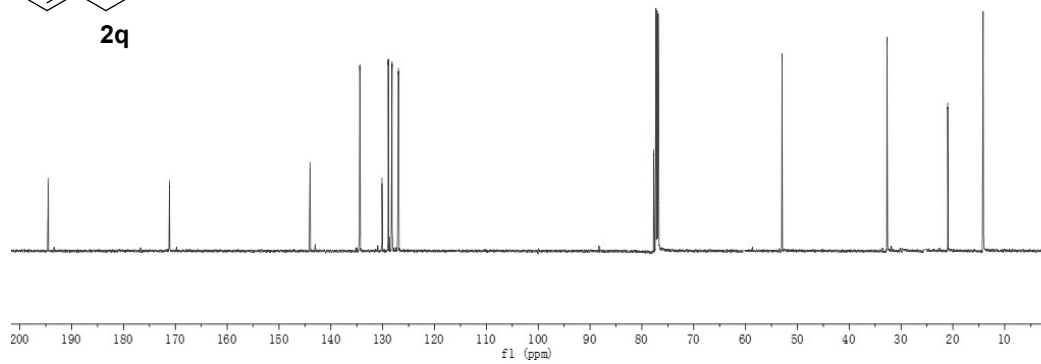



4.3459  
4.3277  
4.2259  
4.2230  
2.6795  
2.6744  
2.6645  
2.6570  
2.6561  
2.6501  
2.6435  
2.6410  
2.6387  
2.6130  
2.6111  
2.6070  
2.6022  
2.5962  
2.5911  
2.5883  
2.5841  
2.5640  
2.5552  
2.5444  
2.5355  
2.5299  
2.4981  
2.4472  
2.0352  
2.0320  
2.0276  
2.0252  
2.0202  
2.0161  
2.0150  
1.8772  
1.8654  
1.8515  
1.8494  
1.8470  
1.8410  
1.8377  
1.8280  
1.8260  
1.8235  
1.8205  
1.8034  
1.7974  
1.7844  
1.7790  
1.7652  
1.7290  
1.7140  
1.7067  
1.6934  
1.6792  
1.6779  
1.6565  
1.6475  
1.6263  
1.5855

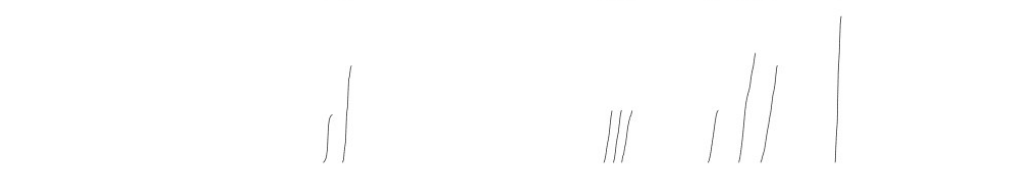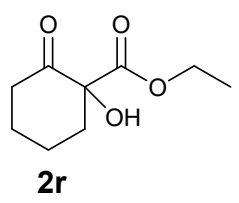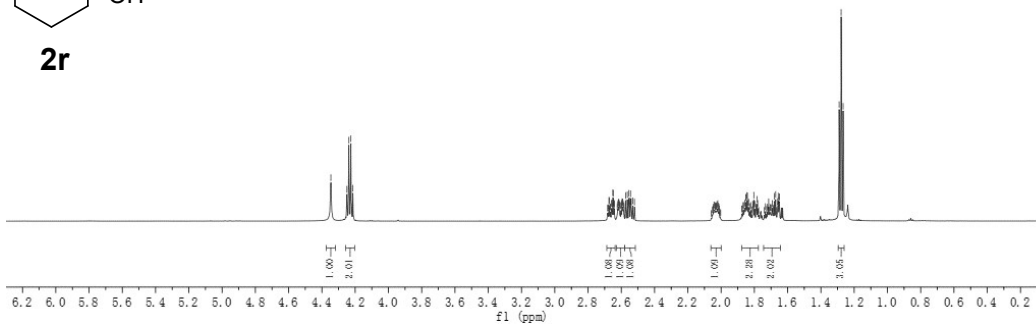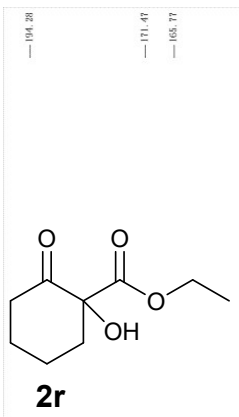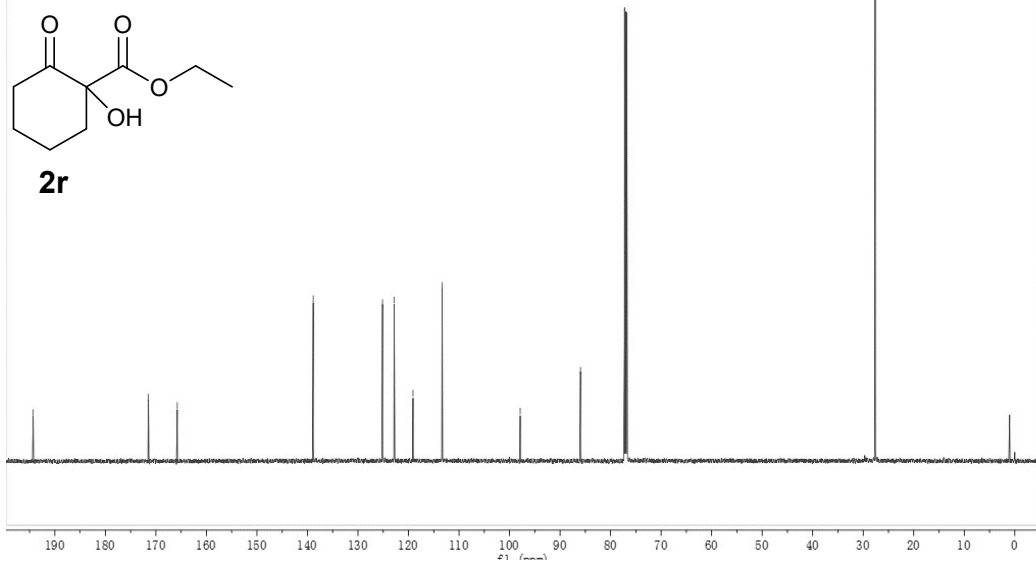

Supplement: d2ra07411g1.pdf [file d2ra07411g1.pdf]
